# Supplementary material for: Protochlorophyllide synthesis by recombinant cyclases from eukaryotic oxygenic phototrophs and the dependence on Ycf54
Source: Oxford University Press journal article supplement (doi:10.1042/bcj20200221), 2020-05-29
Supplement: bcj-2020-0221_supp.pdf [file bcj-2020-0221_supp.pdf]

**SUPPLEMENTARY MATERIALS**

**Table S1. Nucleotide sequences of synthesized genes used in this study**

| <b>Gene</b>  | <b>Sequence (5'-3')</b>                                                                                                                                                                                                                                                                                                                                                                                                                                                                                                                                                                                                                                                                                                                                                                                                                                                                                                                                                                                                                                                                                                                                                                                                                           |
|--------------|---------------------------------------------------------------------------------------------------------------------------------------------------------------------------------------------------------------------------------------------------------------------------------------------------------------------------------------------------------------------------------------------------------------------------------------------------------------------------------------------------------------------------------------------------------------------------------------------------------------------------------------------------------------------------------------------------------------------------------------------------------------------------------------------------------------------------------------------------------------------------------------------------------------------------------------------------------------------------------------------------------------------------------------------------------------------------------------------------------------------------------------------------------------------------------------------------------------------------------------------------|
| <i>CHL27</i> | ATGAGCGCCAGCTCTTCTCCACCTCCTCCAACACTGCCACGAGCAAGTCAAAGAAAGGTAC<br>AAAAAAGGAGATACAAGAATCCCTGTTGACGCCTCGTTTTTACACTACCGATTTTGAGGAGA<br>TGGAGCAGTTGTTTTAACACTGAGATAAAACAAAAATCTTAATGAAGCCGAGTTTGAAGCTCTT<br>TTACAAGAGTTTAAAACCGATTATAACCAAACCTCATTTTCGTCCGGAATAAGGAGTTCAAGGA<br>AGCAGCTGACAACTTCAGGGTCCTTTACGTCAAATTTTCGTGGAATTCCTGGAGAGATCAT<br>GTACCGCTGAGTTTTTCGGGATTCTTGCTGTACAAGGAACCTGGTTCGGCGCCTGAAGAAAACC<br>AACCTGTAGTTGCAGAGATTTTCTCCTTGATGAGCCGCGACGAAGCAAGACACGCGGGCTT<br>TTTAAATAAAGGTTTGAGCGATTTTAATTTGGCGCTTGATTTAGGGTTTCTTACCAAAGCCC<br>GCAAATATACTTTTTTCAAACCGAAATTCATTTTTTACGCGACTTATCTTAGCGAAAAGATA<br>GGTTACTGGCGCTACATAACAATTTATCGCCACTTAAAAGAAAATCCGGAGTTCCAGTGTTA<br>TCCGATCTTCAAATACTTCGAGAACTGGTGCCAAGATGAAAATCGGCATGGCGACTTCTTCT<br>CCGCCCTGATGAAGGCGCAGCCTCAATTTTTTAAATGACTGGCAGGCAAAAACCTGTGGAGCCGC<br>TTCTTCTGCTTGAGCGTATACGTACAGATGTACTTAAATGATTGCCAGCGTACAAAATTTTAA<br>TGAGGGTATTGGGCTTAACACCAAAGAGTTTGATATGCATGTTATAATCGAGACGAACCGGA<br>CTACGGCTAGAATATTTCTGCCGTATTAGACGTGGAGAATCCAGAATCAAACGCAAACCTT<br>GATCGTATGGTGGTCTCGTATGAGAAGTTACTTGCGATAGGAGAGACAGATGATGCAAGTTT<br>CATCAAACATTGAAACGTATCCCCTGGTTCACATCATTGGCCTCCGAGATCCTGGCGGCAT<br>ACTTGATGCCGCCAGTAGAATCCGGTTCTGTAGATTTTGTGAGTTCGAGCCAAATTTGGTC<br>TACTAA    |
| <i>YCF54</i> | ATGTCAACGAAATATCATTTTTTTGGTAGCAAATGCCAAATTTATGTTGGATGAAGAGGAGCA<br>TTTCCAAGAGCAATTAATTTGAGCGCCTTCGGTATTTTCGGAGAGCGGGAACCTGGTACAAGATT<br>TTTGGCTGGTCATTGAACCCAAATTCCTGGATAATTTCCCAAGATAACCCAACGCTTGCGG<br>CGGCCAGCCGTAGCGCTTGTACGACTAATGGAACGTGGATCACCTTTATGAAGCTGCGTCT<br>GGACCGGTGCTGTACGACTCGTTCGAAGCCACATCGTTAGATGAGGCGCTTGCGAGTAATC<br>CTACCACGCTTGAATTTGATAAGCCTAAGAATTGGGTAGCGCCGTATCCGAAGTACGAGCCA<br>GGCTGGTGGGATACCTTTTTGCCGAAGGTCACGCAAGAGTCCGCCGTCTAA                                                                                                                                                                                                                                                                                                                                                                                                                                                                                                                                                                                                                                                                                                                                                                                  |
| <i>CRD1</i>  | ATGGTACAAGCAAGCGCGGCCCGCTTAACGACGGTTTTGGGGTTCGAAACGATGCGTGACGG<br>TATCAAAGTGGCCGCTAAGGAAACGTTGCTTACACCACGGTTTTTATACGACGGACTTTGACG<br>AAATGGAGCAACTGTTCTCTAAGGAAATTAACCCAAACCTTGACATGGAAGAGCTGAACGCA<br>TGTCTTAATGAATCCGTAACGATTACAATAAGGTTCACTTCGTCCGGAATGAAACGTTTAA<br>AGCCGCTGCGGACAAGGTAACAGGGGAGACACGATATATTATTGATTCCTTGAGCGGT<br>CTTGCACGCGCAGAGTTTTTCGGGCTTCTTGTATATAAAGAGTTGGCTCGGCCGATGAAAGCC<br>AGCAGCCCGGAGGTAGCTGAGATGTTCTTGCTTATGTCCCGGACGAGGCCCGTCATGCAGG<br>GTTTTCTTAAACAAGGCTTTGTGCGATTTTAACTTGCCTTAGACCTTGGGTTTTCTTACAAAAG<br>ATAGAACCTACACGTACTTTAAACCGAAATTTATCATTTATGCTACATTTTTTAAAGCGAAAAG<br>ATAGGGTACTGGAGATATATAACCATATATCGGCACCTGCAACGTAATCCGGACAATCAGTT<br>CTATCCCCTTTTTGAATACTTCGAAAACCTGGTGCCAGGATGAAAACCGCCACGGTGATTTCC<br>TGGCAGCATGCCTTAAAGCGAAGCCCGAACTTTTGAACACCTTCGAAGCAAAGCTGTGGAGC<br>AAGTTTTTTTTGCTTAAAGCGTATATATTACAATGTATTTGAACGATCACCAACGCACCAAAT<br>CTATGAATCTCTTGGGTTGAATACTCGTCAATTCACCAACATGTCATTATAGAAACCAACC<br>GCGCTACCGAAAGATTGTTTTCCAGTCGTGCCTGACGTTGAAGATCCGAGATTTTTTCGAAATC<br>CTTAATAAAATGGTGGATGTGAATGCCAAGCTGGTAGAGTTAAGTGCCTCGTCCAGCCCACT<br>TGCTGGACTTCAAAGTTACCCCTTTTAGAGCGGATGGCCTCGTACTGCTTACAACTTTTGT<br>TTTTTAAAGGAAAAGGACGTCGGATCGGTAGATATCGCCGGGAGTGGCGCTTCGAGAAAACCTA<br>GCTTACTAA |
| <i>CTH1</i>  | ATGGTGGCGGCAACAGCCGCGCCACAGGAAGTAGAAGGTTTTAAAGTTATGCGCGACGGCAT<br>TAAAGTGGCCTCCGACGAAACGCTTTTAAACACCCCGTTTCTATAACACTGATTTTGACGAGA<br>TGGAGCGTCTTTTTAGTCTTGAGTTGAACAAGAATATGGACATGGAAGAGTTCGAAGCCATG<br>TTGAATGAATTAAGTTGATTATAATCAACGCCACTTTGTTTCGCAATGAGACGTTTAAAGA<br>AGCGGGGAAAAGATCCAAGGACCCACACGTAATAATCTTTATTGAGTTTCTTGAGCCTTCCCT<br>GTACAGCAGAGTTCTCTGGATTTTTACTGTATAAGGAACTGGGACGTCGCCTGAAAGCTACG<br>AACCCAGTAGTAGCCGAAATTTTACGCTTATGTGCGCGACGAAGCACGTCATGCTGGTTTT<br>TTTTGAATAAAGCGATGTCCGATTTTAAATTTGGCACTTACTTAGGTTTTCTTGACTAAGAACC<br>GTAAATATACTTTCTTCAAACCTAAATTCATCTTTTACGCCACATACTTATCCGAGAAAATC                                                                                                                                                                                                                                                                                                                                                                                                                                                                                                                                                                                                                                  |

|              |                                                                                                                                                                                                                                                                                                                                                                                                                                                                                                                                                                                                                           |
|--------------|---------------------------------------------------------------------------------------------------------------------------------------------------------------------------------------------------------------------------------------------------------------------------------------------------------------------------------------------------------------------------------------------------------------------------------------------------------------------------------------------------------------------------------------------------------------------------------------------------------------------------|
|              | GGTTATTGGCGCTATATCAGTATCTACCGCCACCTGCAGCGCAATCCAGACAACCAATTGTA<br>CCCCTTATTCGAATATTTTGAGAACTGGTGTCAAGACGAAAACCGTCATGGTGACTTTTTCA<br>CTGCCGTCCTGAAAGCACGCCCCGAAATGGTCAATGATTGGGCAGCGAAACTGTGGTCACGC<br>TTCTTCTGCCTTAGTGTATACATTACGATGTACTTGAATGATCACCAACGTGACGCATTTTA<br>TAGCTCCCTGGGGCTGAACACAACGCAATTTAATCAACACGTGATCATTGAAACTAATAAAT<br>CGACAGAGCGTATTTTCCCTGCTGTGCCAGATGTGGAAAATCCTGAGTTTTTTTCGCCGTATG<br>GACTTGTGGTGAATACAACGCACAACCTGGTGAACATTGGCTCAATGAACTTGCCTTCTCC<br>CATTAAAGCAATTATGAAAGCACCTATCTTAGAACGCATGGTCGCGGAAGTCTTTCAAGTAT<br>TTATTATGACGCCGAAAGAGAGCGGTTTCGTATGATCTTGATGCCAACAAGACAGCTCTTGTA<br>TATTAA |
| <b>CGL78</b> | ATGCCTGCTCCAGCAGCTGCTTCAGCCGATAAAGCAACAGCGGCCGAATACTACGCCCTTGT<br>CTGCAACGCCGAATGGTTCTTCATGGACCCGAAAACGAGTCGGTTGCTGAACAATTGAGAG<br>AGAAGGTAAGATTCTTCAAAGAGCAGAACAAGAACGGGATTTCTTCATCGTGCCAAATCCC<br>AAGTGGCTGGACGCCAAGTTCCCGAACAGGCTAAGCAAGTCAAAGACCATGCGTAGCGCT<br>GGTCAGTACCGACAAAATGTGGATTACATTCATGAAGTTGCGCTTGGACCGTGTGTTGAAGA<br>TCGACTTAAAAAGTATGCCAGCGAGCGAGGTCCTTGC GGCTGGGGAAGCATTGCCGGATTC<br>AAGCCGGACGAAAGTGGACAGCGCCGTATGCCAGATACACTCCCGGTTGGTGAATGTATT<br>TCTGCCTAATCATTAA                                                                                                                                  |

**Table S2. Primers used in this study**

| <b>Primer</b>    | <b>Sequence (5'-3')</b>                                  |
|------------------|----------------------------------------------------------|
| cyclBglII_F      | GAGTCTAGATCTATGGTTAATACCCCTCGAAAAGCCC                    |
| cyclNotI_R       | GAGTCTGCGGCCGCTTAGCGCACAGCTCCAGCCAAC                     |
| ycf54NotI_R      | GAGTCTGCGGCCGCTAATCCAGGGATGCAAGGGGGT                     |
| CHL27BglII_F     | GAAAGATCTATGAGCGCCAGCTCTTCTCC                            |
| CHL27XhoI_R      | GAACTCGAGTTAGTAGACCAAATTTGGCTCGAA                        |
| CHL27rbsYCF54_F  | AGCCAAATTTGGTCTACTAATATAGGAGCTTGGATTATGTCAACGAAATATCATT  |
| CHL27rbsYCF54_R  | AATGATATTTTCGTTGACATAATCCAAGCTCCTATATTAGTAGACCAAATTTGGCT |
| YCF54XhoI_R      | GAACTCGAGTTAGACGGCGGACTCTTGCG                            |
| CHL27NdeI_F      | GGAACATATGAGCGCCAGCTCTTCTCC                              |
| CHL27SpeI_R      | GGAAACTAGTTTATAGTAGACCAAATTTGGCTCG                       |
| YCF54NdeI_F      | GGAACATATGTCAACGAAATATCATTTTTTTGGTA                      |
| YCF54SpeI_R      | GGAAACTAGTTTATAGACGGCGGACTCTTGCG                         |
| YCF54truncSpeI_R | GGAAACTAGTTTAATTACTCGCAAGCGCCTC                          |
| CRD1NdeI_F       | GGAACATATGGTACAAGCAAGCGCGGCC                             |
| CRD1SpeI_R       | GGAAACTAGTTTATAGTAAGCTAAGTTTCTCGAAG                      |
| CTH1NdeI_F       | GGAACATATGGTGGCGGCAACAGC                                 |
| CTH1SpeI_R       | GGAAACTAGTTTAATATAACAAGAGCTGTCTTGT                       |
| CGL78NdeI_F      | GGAACATATGCCTGCTCCAGCAGCTGCTT                            |
| CGL78SpeI_R      | GGAAACTAGTTTAATGATTAGGCAGAAATACAT                        |

**Table S3. Strains and plasmids described in this study**

| Strain/Plasmid                                   | Description                                                                                                                           | Source        |
|--------------------------------------------------|---------------------------------------------------------------------------------------------------------------------------------------|---------------|
| <b><i>E. coli</i></b>                            |                                                                                                                                       |               |
| JM109                                            | Cloning strain for plasmid constructs                                                                                                 | Promega       |
| S17-1                                            | Conjugation strain for pBBRBB- <i>Ppuf</i> <sub>843-1200</sub> constructs                                                             | [1]           |
| C43(DE3)                                         | Expression strain for <i>in vivo</i> cyclase assays                                                                                   | [2]           |
| <b><i>Rvi. gelatinosus</i></b>                   |                                                                                                                                       |               |
| IL144                                            | WT strain                                                                                                                             | S. Nagashima* |
| $\Delta bchE\Delta acsF$                         | Unmarked deletion mutant of <i>bchE</i> and <i>acsF</i> in WT                                                                         | [3]           |
| $\Delta bchE\Delta acsF$ <i>Rif</i> <sup>R</sup> | Spontaneous rifampicin resistant mutant isolated from $\Delta bchE\Delta acsF$                                                        | This study    |
| <b>Plasmid</b>                                   |                                                                                                                                       |               |
| pBBRBB- <i>Ppuf</i> <sub>843-1200</sub>          | Expression vector carrying the 843–1200 region of the <i>puf</i> promoter of <i>Rba. sphaeroides</i> , Km <sup>R</sup>                | [4]           |
| pBB[ <i>acsF</i> ]                               | <i>Rvi. gelatinosus acsF</i> gene cloned into BglII/NotI sites of pBBRBB- <i>Ppuf</i> <sub>843-1200</sub>                             | [5]           |
| pBB[ <i>cycl</i> ]                               | <i>Synechocystis cycl</i> gene cloned into BglII/NotI sites of pBBRBB- <i>Ppuf</i> <sub>843-1200</sub>                                | This study    |
| pBB[ <i>cycl-ycf54</i> ]                         | <i>Synechocystis cycl-ycf54</i> genes cloned into BglII/NotI sites of pBBRBB- <i>Ppuf</i> <sub>843-1200</sub>                         | This study    |
| pBB[ <i>CHL27</i> ]                              | Synthesized gene encoding <i>Arabidopsis</i> CHL27 cloned into BglII/XhoI sites of pBBRBB- <i>Ppuf</i> <sub>843-1200</sub>            | This study    |
| pBB[ <i>CHL27-YCF54</i> ]                        | Synthesized genes encoding <i>Arabidopsis</i> CHL27 and YCF54 cloned into BglII/XhoI sites of pBBRBB- <i>Ppuf</i> <sub>843-1200</sub> | This study    |
| pET3a                                            | Expression vector carrying T7 promoter, Amp <sup>R</sup>                                                                              | Novagen       |
| IM                                               | <i>Synechocystis chlI, chlD, chlH, gun4</i> and <i>chlM</i> genes cloned into pET3a sequentially using link and lock method           | [5]           |
| IA                                               | <i>Rvi. gelatinosus acsF</i> gene cloned into IM                                                                                      | [5]           |
| IM- <i>cycl</i>                                  | <i>Synechocystis cycl</i> gene cloned into IM                                                                                         | [5]           |
| IM- <i>cycl-ycf54</i>                            | <i>Synechocystis ycf54</i> gene cloned into IM- <i>cycl</i>                                                                           | [5]           |
| IM- <i>CHL27</i>                                 | Synthesized gene encoding <i>Arabidopsis</i> CHL27 cloned into IM                                                                     | This study    |
| IM- <i>CHL27-YCF54</i>                           | Synthesized gene encoding <i>Arabidopsis</i> YCF54 cloned into IM- <i>CHL27</i>                                                       | This study    |

|                 |                                                                                                                  |            |
|-----------------|------------------------------------------------------------------------------------------------------------------|------------|
| IM-CRD1         | Synthesized gene encoding <i>Chlamydomonas</i> CRD1 cloned into IM                                               | This study |
| IM-CRD1-CGL78   | Synthesized gene encoding <i>Chlamydomonas</i> CGL78 cloned into IM-CRD1                                         | This study |
| IM-CTH1         | Synthesized gene encoding <i>Chlamydomonas</i> CTH1 cloned into IM                                               | This study |
| IM-CTH1-CGL78   | Synthesized gene encoding <i>Chlamydomonas</i> CGL78 cloned into IM-CTH1                                         | This study |
| IM-CHL27-ycf54  | <i>Synechocystis ycf54</i> gene cloned into IM-CHL27                                                             | This study |
| IM-CRD1-ycf54   | <i>Synechocystis ycf54</i> gene cloned into IM-CRD1                                                              | This study |
| IM-cycl-YCF54   | Synthesized gene encoding <i>Arabidopsis</i> YCF54 cloned into IM-cycl                                           | This study |
| IM-cycl-CGL78   | Synthesized gene encoding <i>Chlamydomonas</i> CGL78 cloned into IM-cycl                                         | This study |
| IM-CHL27-YCF54* | Synthesized gene encoding <i>Arabidopsis</i> YCF54 with C-terminal 37 aa truncated (YCF54*) cloned into IM-CHL27 | This study |

\*Research Institute for Photosynthetic Hydrogen Production, Kanagawa University, Yokohama, Japan.

†School of Life Sciences, Arizona State University, AZ 85281.

## References

- 1 Simon, R., Priefer, U. and Puhler, A. (1983) A broad host range mobilization system for *in vivo* genetic engineering: transposon mutagenesis in gram negative bacteria. *Nat. Biotechnol.* **1**, 784–791
- 2 Miroux, B. and Walker, J. E. (1996) Over-production of proteins in *Escherichia coli*: mutant hosts that allow synthesis of some membrane proteins and globular proteins at high levels. *J. Mol. Biol.* **260**, 289–298
- 3 Chen, G. E., Canniffe, D. P. and Hunter, C. N. (2017) Three classes of oxygen-dependent cyclase involved in chlorophyll and bacteriochlorophyll biosynthesis. *Proc. Natl. Acad. Sci. U.S.A.* **114**, 6280–6285
- 4 Tikh, I. B., Held, M. and Schmidt-Dannert, C. (2014) BioBrick compatible vector system

for protein expression in *Rhodobacter sphaeroides*. *Appl. Microbiol. Biotechnol.* **98**, 3111–3119

- 5 Chen, G. E., Canniffe, D. P., Barnett, S. F. H., Hollingshead, S., Brindley, A. A., Vasilev, C., Bryant, D. A. and Neil Hunter, C. (2018) Complete enzyme set for chlorophyll biosynthesis in *Escherichia coli*. *Sci. Adv.* **4**, eaaq1407
